# Supplementary material for: Selenium substitution endows cystine with radiosensitization activity against cervical cancer cells
Source: Royal Society of Chemistry journal article supplement (doi:10.1039/c4ra07031c), 2014-01-01
Supplement: c4ra07031c1.pdf [file c4ra07031c1.pdf]

## **Supporting information**

for

### **Selenium substitution endows cystine radiosensitization activity against cervical cancer Hela cells**

Qiang Xie <sup>a,b,#</sup>, Lizhen He <sup>a,#</sup>, Haoqiang Lai <sup>a</sup>, Wenjie Zheng <sup>a</sup>, Tianfeng Chen <sup>a,\*</sup>

## Results

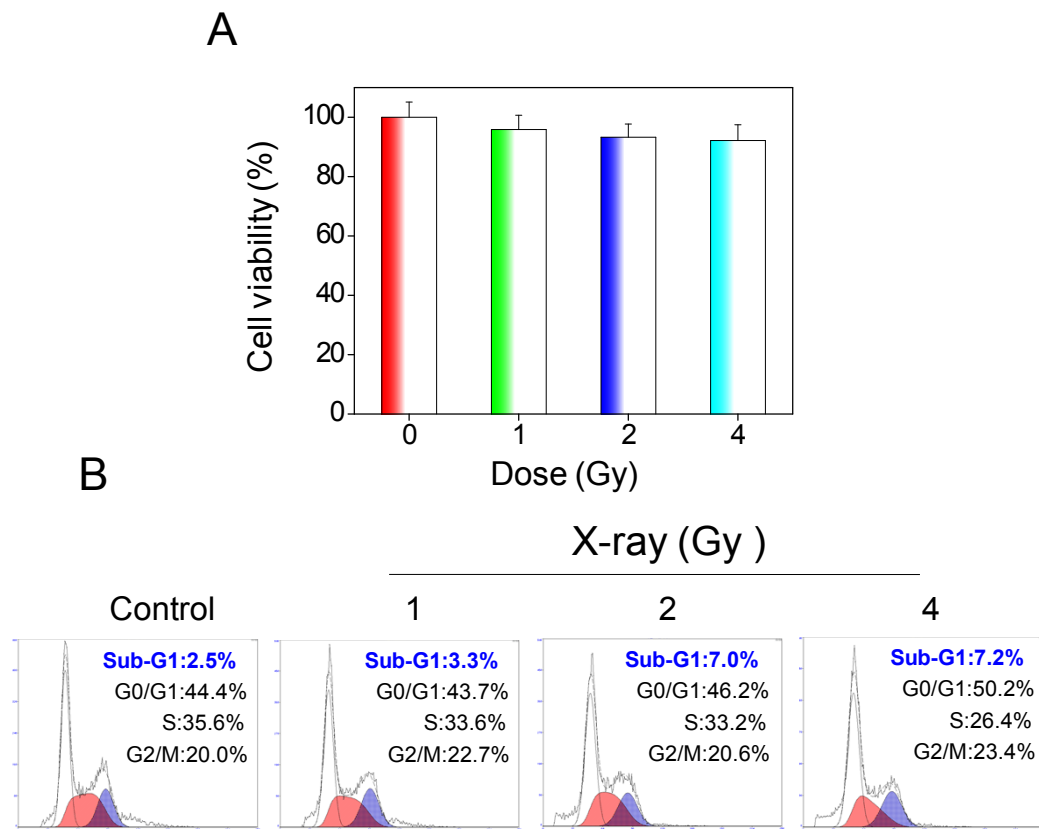

**Figure S1. Effects of X-ray on HeLa cells growth.** (A) Viability of HeLa cells treated by different doses of X-ray, and then cultured for 24 h. (B) Flow cytometric analysis of HeLa cells exposed to X-ray at 1-4 Gy and cultured for 24 h.

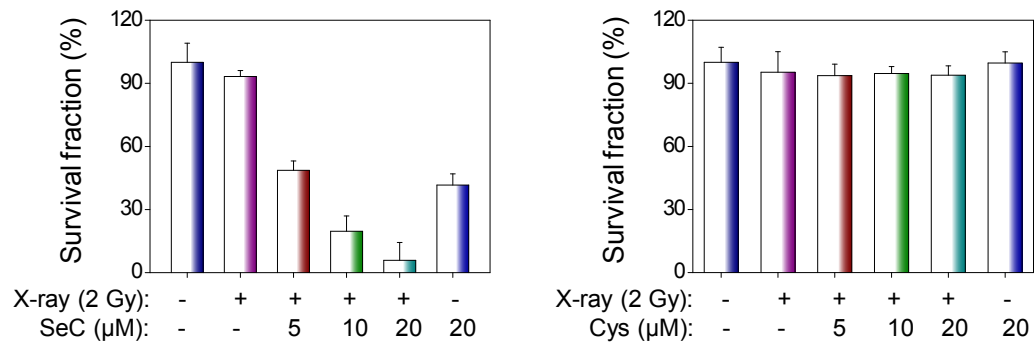

**Figure S2.** Survival fraction of HeLa cells treated with SeC or Cys with or without X-ray by clonogenic assay.

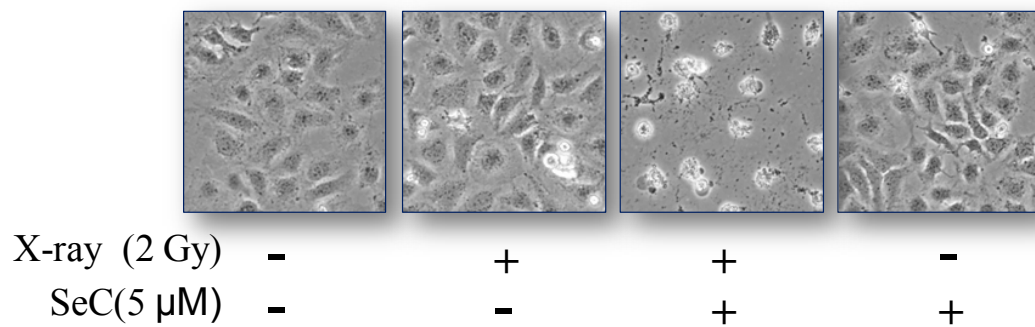

**Figure S3** Effects of SeC and X-ray on HeLa cell morphology. Cells were treated with SeC for 2 h, exposed to X-ray (2 Gy) and then cultured for 24 h.

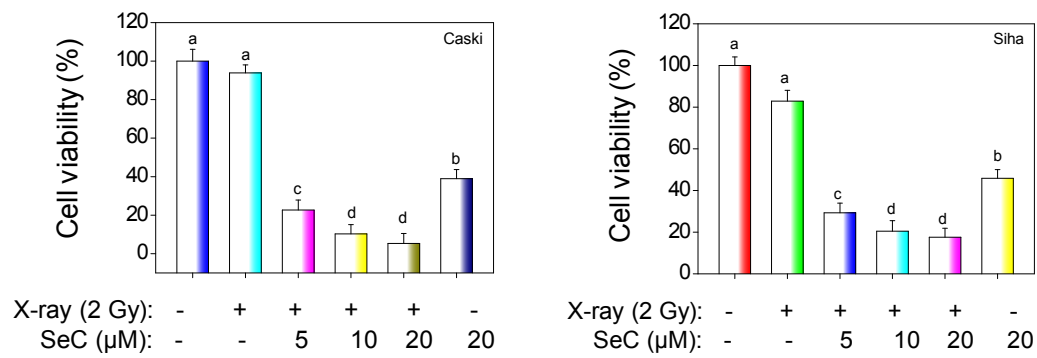

**Figure S4.** Viability of Caski and Siha cells treated with SeC and X-ray. Cell viability was determined by MTT assay.
